# Supplementary material for: Electrochemical and Raman spectroscopy identification of morphological and phase transformations in nanostructured TiO2(B)
Source: Royal Society of Chemistry journal article supplement (doi:10.1039/c4ta04394d), 2014-01-01
Supplement: c4ta04394d1.pdf [file c4ta04394d1.pdf]

SUPPORTING INFORMATION FOR:

# Electrochemical and Raman Spectroscopy Identification of Architectural and Morphological Transformations in Nanostructured TiO<sub>2</sub>(B)

Anthony G. Dylla and Keith J. Stevenson\*

Department of Chemistry, The University of Texas at Austin, Austin, Texas, 78712, USA

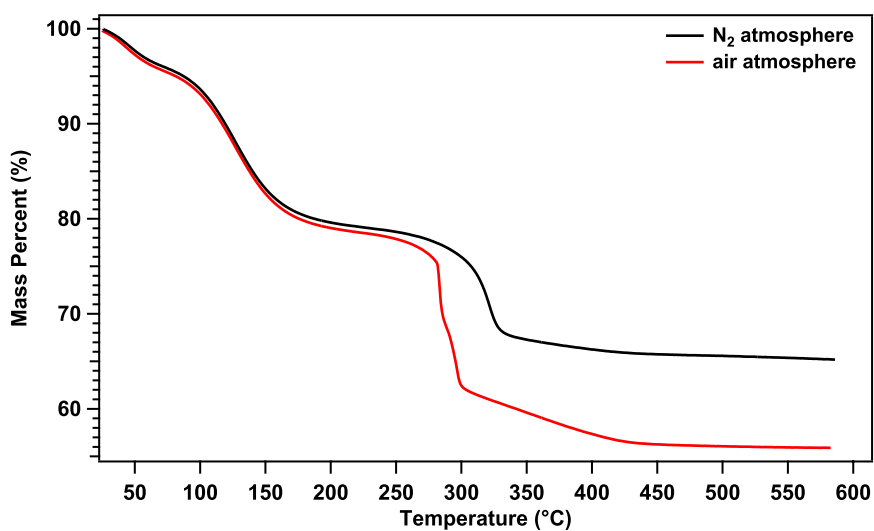

**Figure S1.** TGA of TiO<sub>2</sub>(B)-NS. The analysis was performed under flowing air and flowing nitrogen atmospheres and the temperature was ramped at a rate of 10 °C/min.
